# Supplementary material for: Whole-genome reference panel of 1,781 Northeast Asians improves imputation accuracy of rare and low-frequency variants
Source: bioRxiv or medRxiv preprint supplement (doi:10.1101/600353), 2019-04-22
Supplement: Supplementary file [file media-2.pdf]

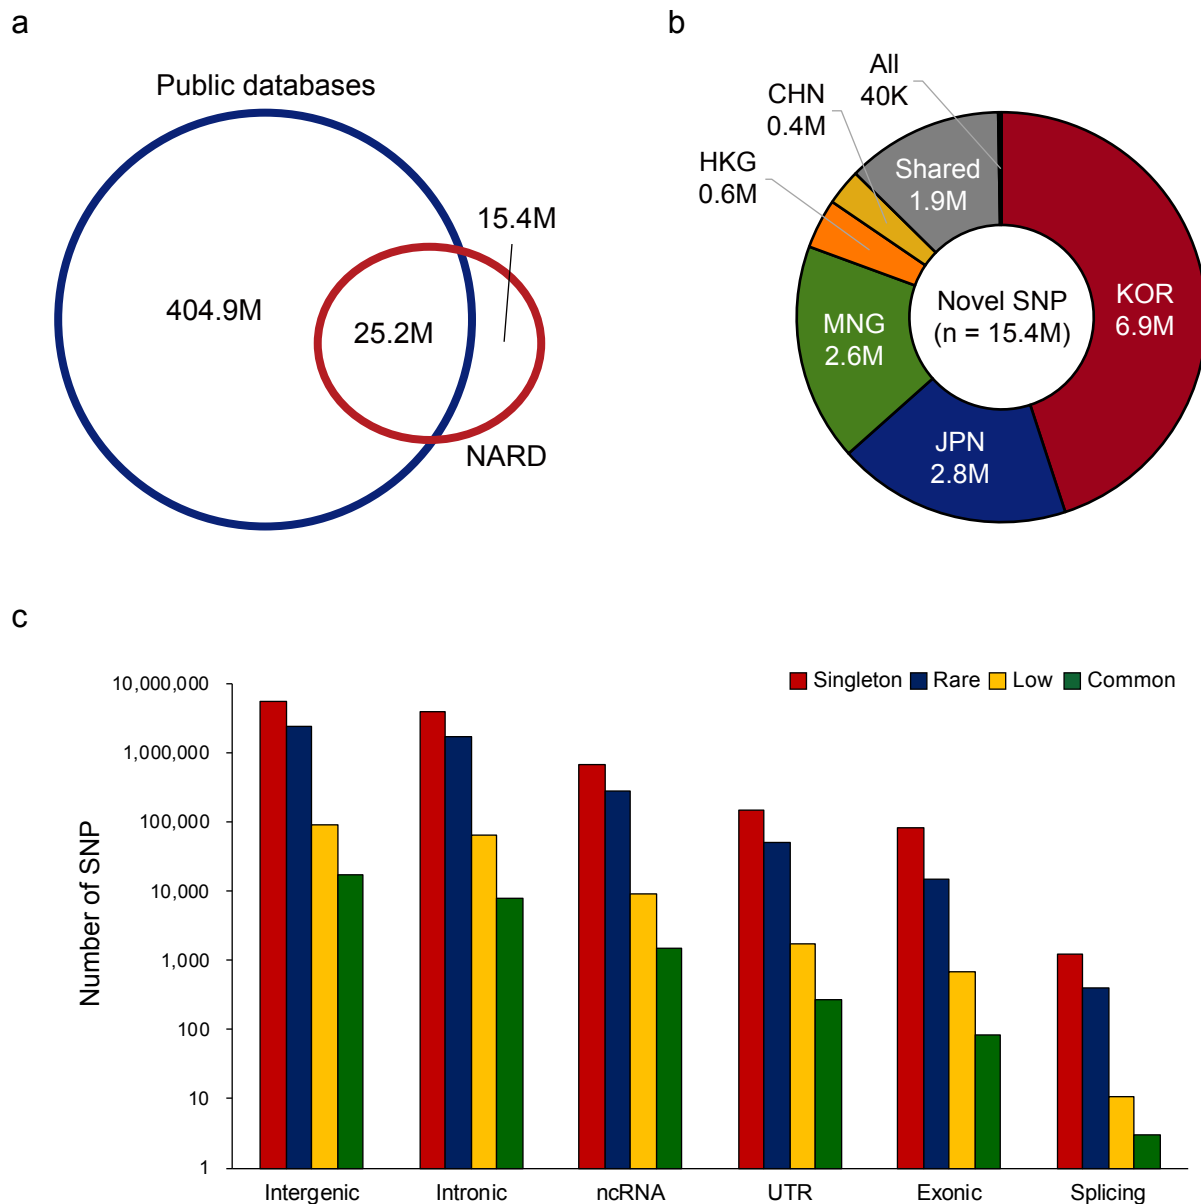

**Supplementary Figure 2. Novel variant statistics.** **a**, Number of novel SNPs that were not identified in elsewhere. Public databases include Kaviar, gnomAD (2.1.1 release), and dbSNP150. **b**, Distribution of novel SNP per population. Novel SNPs found in multiple and all populations were included in 'Shared' and 'All', respectively. **c**, Distribution of novel SNPs based on RefSeq gene definition.
