# Supplementary material for: Whole-genome reference panel of 1,781 Northeast Asians improves imputation accuracy of rare and low-frequency variants
Source: bioRxiv or medRxiv preprint supplement (doi:10.1101/600353), 2019-04-22
Supplement: Supplementary file [file media-4.pdf]

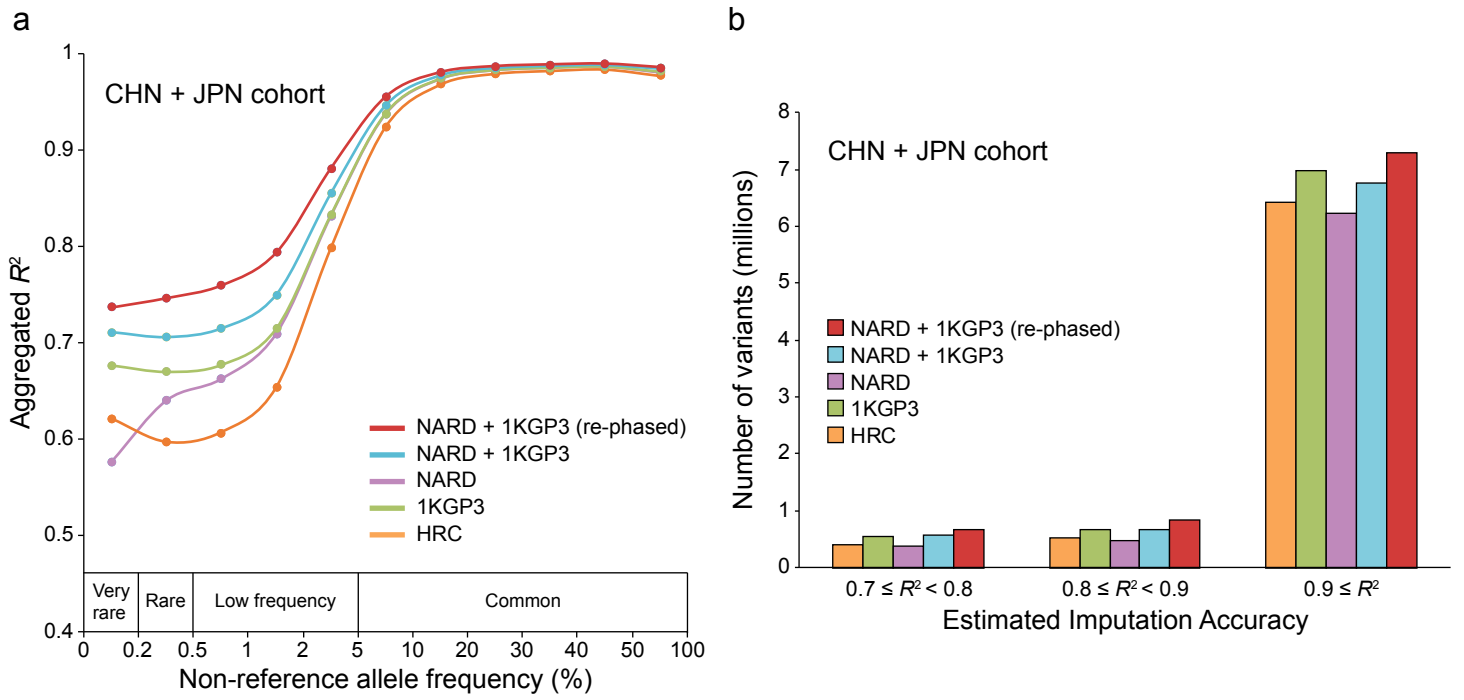

**Supplementary Figure 4. Imputation performance evaluation. a**, Imputation accuracy assessment using five different reference panels. The pseudo-GWAS panel of 106 Northeast Asian individuals was used for imputation. The x-axis represents MAF of 2,093 Northeast Asian individuals from NARD and 1KGP3. The y-axis represents the aggregated  $R^2$  values of SNPs which were calculated by the true genotypes and the imputed dosages. Only SNPs that were imputed across all panels were used for the aggregation of  $R^2$  values. **b**, Number of imputed SNPs as a function of the estimated imputation accuracy and the types of imputation panel. This result was generated based on the  $R^2$  values that were estimated by Minimac3.
