# Supplementary material for: Whole-genome reference panel of 1,781 Northeast Asians improves imputation accuracy of rare and low-frequency variants
Source: bioRxiv or medRxiv preprint supplement (doi:10.1101/600353), 2019-04-22
Supplement: Supplementary file [file media-6.pdf]

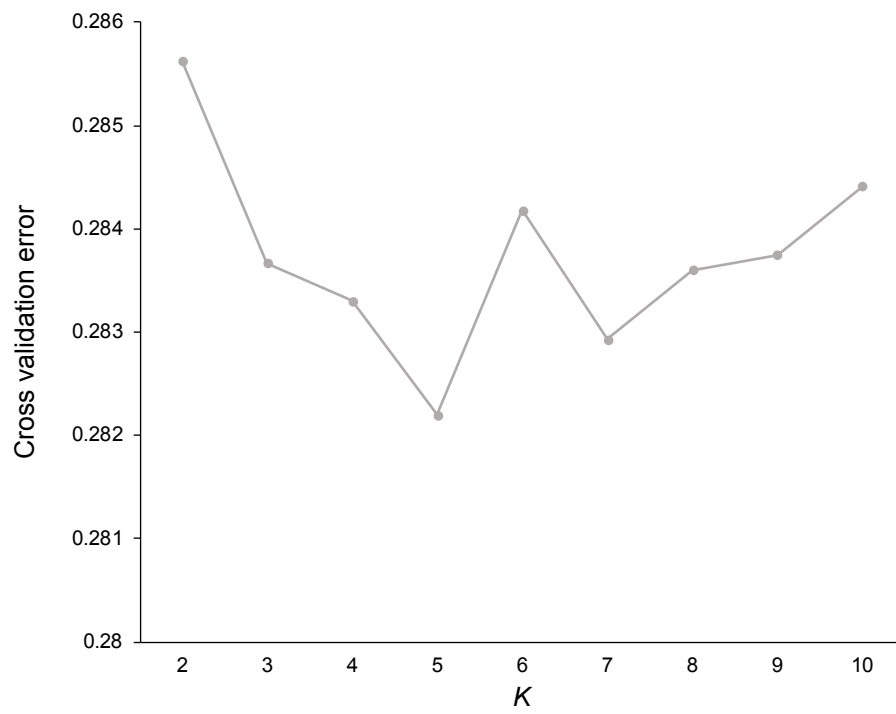

**Supplementary Figure 6. The cross-validation error inferred by ADMIXTURE algorithm.**
